# Supplementary material for: Curvature induces and enhances transport of spinning colloids through narrow channels
Source: Royal Society of Chemistry journal article supplement (doi:10.1039/d4sm00829d), 2024-01-01
Supplement: d4sm00829d3.pdf [file d4sm00829d3.pdf]

Supporting Information for the article:

**Curvature induces and enhances transport of spinning  
colloids through narrow channels**

By Eric Cereceda-López, Marco De Corato, Ignacio Pagonabarraga, Fanlong Meng,  
Pietro Tierno, Antonio Ortiz-Ambriz

**Supporting Videos.**

**Movie S1**(.AVI): real time video showing the dynamics of single paramagnetic colloidal particles with radius  $a = 1.4 \mu\text{m}$  and spinning within a sequence of circular rings having width  $3 \mu\text{m}$  and separated by a distance of  $10 \mu\text{m}$ . The external precessing magnetic field is characterized by an amplitude  $H_0 = 900 \text{A m}^{-1}$ , driving frequency  $f = 50 \text{Hz}$  and a cone angle  $\theta = 44.5$  degrees. The video corresponds to Figure 1(a) of the article.

**Movie S2**(.AVI): real time video showing the dynamics of many paramagnetic colloidal particles with radius  $a = 1.4 \mu\text{m}$  and spinning within a sequence of circular rings having width  $3 \mu\text{m}$  and separated by a distance of  $10 \mu\text{m}$ . The external precessing magnetic field is characterized by an amplitude  $H_0 = 900 \text{Am}^{-1}$ , driving frequency  $f = 50 \text{Hz}$  and a cone angle  $\theta = 44.5$  degrees. The video corresponds to the situation described in Figures 4 of the article.
